## Competing Interests

The authors are not supported by, nor maintain any financial interest in, any commercial activity that may be associated with the topic of this article.

## Correspondence

Address correspondence to Dr. Kalkman: c.j.kalkman@umcutrecht.nl.

## References

1. O'Leary JD, Janus M, Duku E, Wijeysondera DN, To T, Li P, Maynes JT, Crawford MW: A population-based study evaluating the association between surgery in early life and child development at primary school entry. *ANESTHESIOLOGY* 2016; 125:272-9
2. Wilder RT, Flick RP, Sprung J, Katusic SK, Barbaresi WJ, Mickelson C, Gleich SJ, Schroeder DR, Weaver AL, Warner DO: Early exposure to anesthesia and learning disabilities in a population-based birth cohort. *ANESTHESIOLOGY* 2009; 110:796-804
3. Qiu L, Zhu C, Bodogan T, Gómez-Galán M, Zhang Y, Zhou K, Li T, Xu G, Blomgren K, Eriksson LI, Vutskits L, Terrando N: Acute and long-term effects of brief sevoflurane anesthesia during the early postnatal period in rats. *Toxicol Sci* 2016; 149:121-33
4. Davidson AJ, Disma N, de Graaff JC, Withington DE: Neurodevelopmental outcome at 2 years of age after general anaesthesia and awake-regional anaesthesia in infancy (GAS): An international multicentre, randomised controlled trial. *Lancet* 2016; 387:239-50
5. DiMaggio C, Sun LS, Kakavouli A, Byrne MW, Li G: A retrospective cohort study of the association of anesthesia and hernia repair surgery with behavioral and developmental disorders in young children. *J Neurosurg Anesthesiol* 2009; 21:286-91

## ANESTHESIOLOGY REFLECTIONS FROM THE WOOD LIBRARY-MUSEUM

From Tops in "Gas" Advertising to Bottom of the Bottle: H. L. Seher, M.D., D.D.S.

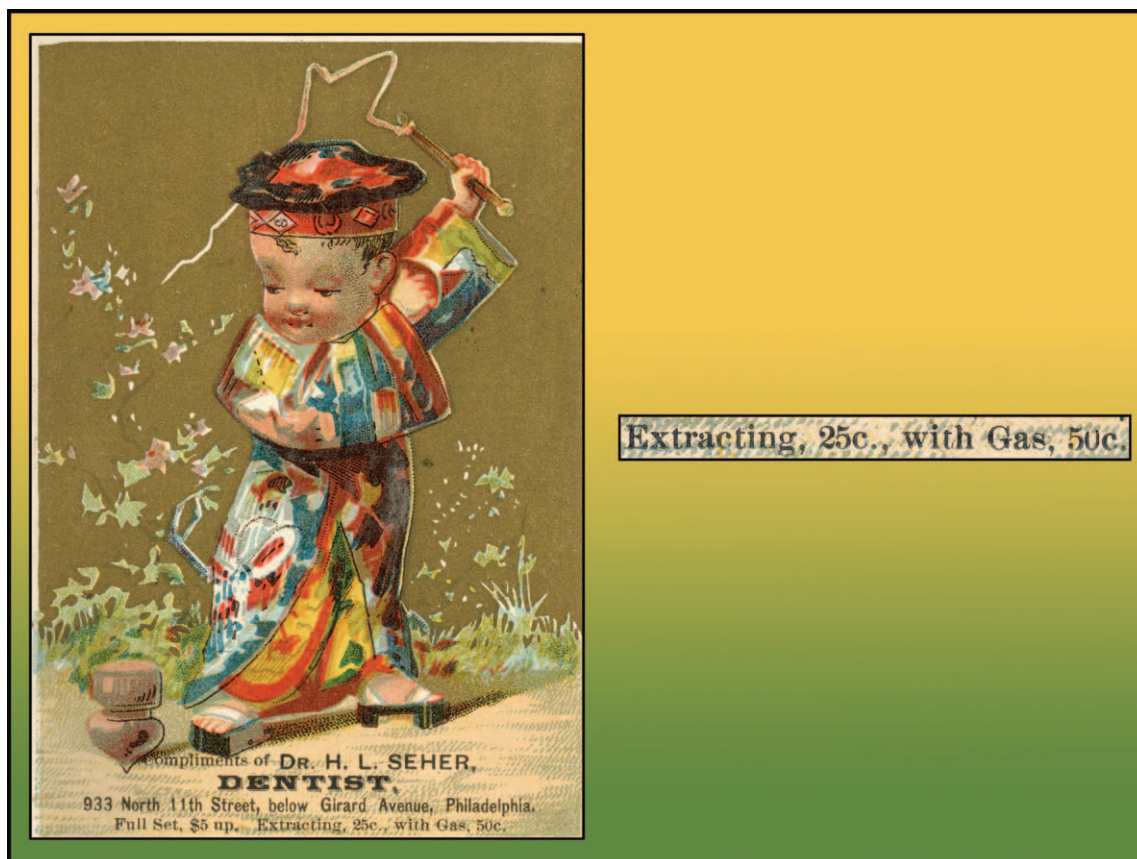

In 1875 Herman L. Seher (1847 to 1897) earned his M.D. and D.D.S. from the Eclectic Medical College of Pennsylvania. His first wife died a decade later, and Dr. Seher remarried in 1888. His heavy drinking soon drove his second wife to separate from him. She moved a few houses down Philadelphia's North 11th Street from where Dr. Seher was practicing dentistry. The laughing gas services that he had advertised initially as costing 25 cents in the 1880s had risen to 50 cents (*right*) by the 1890s. By then, Dr. Seher had also begun distributing this dental trade card (*left*) featuring a boy in Asian attire. A toy depicted in the card's lower left, a wooden top, was an apt metaphor for Dr. Seher's personal life, which had begun spinning wildly out of control. After his 11-year-old daughter died, the dentist began battering his estranged wife. Not long after making bail for "habitual drunkenness and wife beating," Dr. Seher found himself clutching the feet of a safecracker who had launched himself out of one of the Seher dental office windows. Finally, in 1897, at 50 years of age, the hapless Dr. Seher died from complications of his alcoholism. This trade card is part of the WLM's Ben Z. Swanson Collection. (Copyright © the American Society of Anesthesiologists' Wood Library-Museum of Anesthesiology)

George S. Bause, M.D., M.P.H., Honorary Curator, ASA's Wood Library-Museum of Anesthesiology, Schaumburg, Illinois, and Clinical Associate Professor, Case Western Reserve University, Cleveland, Ohio. UJYC@aol.com.
